# Supplementary material for: Role of the larval feeding morphology and digestive enzyme activity in the early development of the polychaete Boccardia wellingtonensis
Source: PeerJ. 2019 Jan 4;7:e6151. doi: 10.7717/peerj.6151 (PMC6322484; doi:10.7717/peerj.6151)
Supplement: Data S1 — Digestive enzymatic activity of different feeding larval. types [file peerj-07-6151-s001.xlsx]

## Sheet: Raw data 
			Raw data table. Absorbance values of each specific enzyme from each sample of larval type. Each absorbance value indicates a replicate of a 180ug standard larval homogenate sample.
				B. wellingtonensis Type I Planktotrophic larvae	B. wellingtonensis Type III Planktotrophic larvae	B. chilensis Planktotrophic larvae	B. wellingtonensis Adelphophagic larvae
			Enzyme	Absorbance
			Alkaline phosphatase	0.09	0.143	0.115	0.159
				0.114	0.103	0.114	0.12
				0.101	0.123	0.077	0.097
			Esterase	0.074	0.096	0.095	0.106
				0.072	0.081	0.113	0.087
				0.073	0.0885	0.076	0.079
			Esterase Lipase	0.075	0.099	0.09	0.143
				0.076	0.08	0.098	0.09
				0.073	0.0895	0.08	0.087
			Lipase	0.082	0.099	0.106	0.093
				0.082	0.084	0.098	0.092
				0.081	0.0915	0.09	0.086
			Leucine arylamidase	0.087	0.159	0.108	0.113
				0.104	0.117	0.101	0.107
				0.092	0.138	0.089	0.114
			Valine arylamidase	0.088	0.115	0.121	0.116
				0.102	0.106	0.112	0.113
				0.095	0.1105	0.093	0.116
			Cistine arylamidasa	0.082	0.104	0.089	0.091
				0.074	0.083	0.078	0.101
				0.08	0.0935	0.084	0.092
			Trypsin	0.074	0.125	0.094	0.103
				0.073	0.094	0.131	0.101
				0.071	0.1095	0.158	0.083
			Alpha chymotrypsin	0.073	0.092	0.087	0.077
				0.067	0.066	0.081	0.084
				0.071	0.079	0.075	0.081
			Acid phosphatase	0.085	0.121	0.085	0.09
				0.094	0.118	0.091	0.106
				0.087	0.1195	0.072	0.093
			Naphthol-AS-BI-phosphohydrolase	0.094	0.098	0.089	0.111
				0.086	0.094	0.096	0.095
				0.09	0.096	0.087	0.107
			Alpha galactosidase	0.064	0.097	0.071	0.086
				0.069	0.071	0.068	0.063
				0.066	0.084	0.075	0.082
			Beta galactosidase	0.069	0.1	0.079	0.067
				0.069	0.081	0.07	0.081
				0.071	0.0905	0.073	0.07
			Beta glucuronidase	0.071	0.099	0.079	0.1
				0.074	0.086	0.078	0.09
				0.074	0.0925	0.077	0.088
			Alpha glucosidase	0.067	0.086	0.094	0.059
				0.073	0.083	0.073	0.089
				0.07	0.0845	0.068	0.077
			Beta glucosidase	0.064	0.098	0.082	0.08
				0.072	0.077	0.066	0.09
				0.069	0.0875	0.065	0.091
			N-acetyl-b glucosaminidase	0.059	0.092	0.087	0.075
				0.082	0.067	0.081	0.093
				0.078	0.0795	0.074	0.083
			Alpha mannosidase	0.068	0.103	0.086	0.058
				0.066	0.088	0.073	0.119
				0.067	0.0955	0.071	0.084
			Alpha fucosidase	0.072	0.125	0.084	0.084
				0.061	0.09	0.083	0.117
				0.069	0.1075	0.074	0.115
